# Supplementary material
Source: PubMed Central journal article supplement (PMC2940462)
Supplement: me.2010-0043_1.pdf [file me.2010-0043_1.pdf]

### Retraction

The publisher of *Molecular Endocrinology* retracts the following article due to significant concerns with the data: “Caveolin 1 Is Required for the Activation of Endothelial Nitric Oxide Synthase in Response to 17 $\beta$ -Estradiol,” by Neetu Sud, Dean A. Wiseman, and Stephen M. Black (*Molecular Endocrinology* 24:1637–1649, 2010; doi: 10.1210/me.2010-0043).
